# Supplementary material
Source: Springer Nature journal article supplement (http://www.springermedizin.de/resource/supplementary/13102_2009_17_MOESM1_ESM.pdf/9667560)

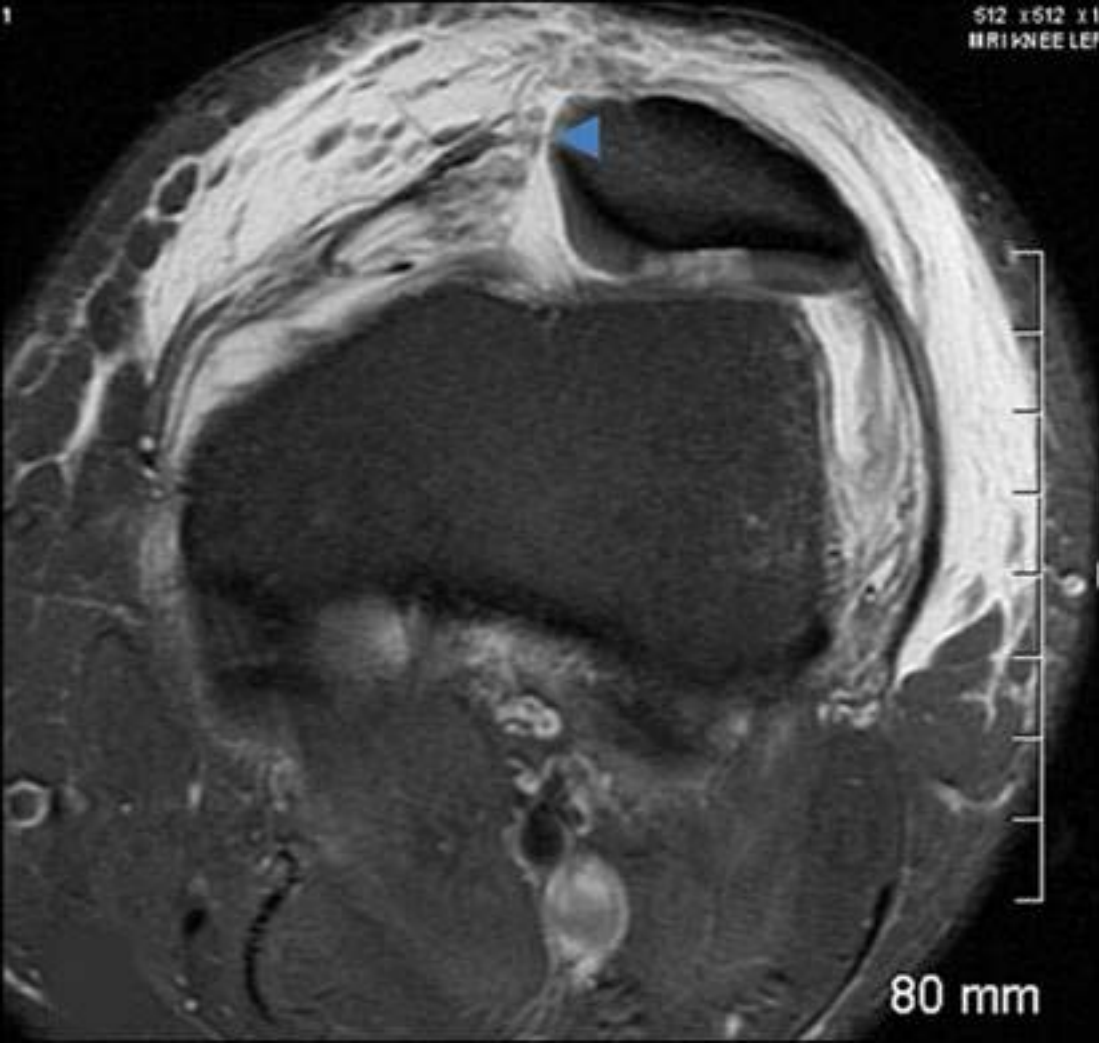

80 mm

Supplement: MOESM1 [file 9667560]
